# Supplementary material for: Design of Nanostructured Hybrid Electrodes Based on a Liquid Crystalline Zn(II) Coordination Complex-Carbon Nanotubes Composition for the Specific Electrochemical Sensing of Uric Acid
Source: MDPI journal article supplement (doi:10.3390/nano12234215), 2022-11-27
Supplement: s1 [file s1]

# Design of Nanostructured Hybrid Electrodes Based on a Liquid Crystalline Zn(II) Coordination Complex-Carbon Nanotubes Composition for the Specific Electrochemical Sensing of Uric Acid

Sorina Negrea <sup>1,2</sup>, Adelina A. Andelescu <sup>3</sup>, Sorina Ilies (b. Motoc) <sup>3</sup>, Carmen Cretu <sup>3</sup>, Liliana Cseh <sup>3</sup>, Mircea Rastei <sup>4</sup>, Bertrand Donnio <sup>4</sup>, Elisabeta I. Szerb <sup>3,\*</sup> and Florica Manea <sup>1,\*</sup>

<sup>1</sup> Department of Applied Chemistry and Engineering of Inorganic Compounds and Environment, Politehnica University of Timisoara, Bvd. Vasile Parvan No. 6, 300223 Timisoara, Romania

<sup>2</sup> National Institute of Research and Development for Industrial Ecology (INCD ECOIND), Timisoara Branch, 300431 Timisoara, Romania

<sup>3</sup> "Coriolan Drăgulescu" Institute of Chemistry, Romanian Academy, 24 Mihai Viteazu Bvd., 300223 Timisoara, Romania;

<sup>4</sup> Institut de Physique et Chimie des Matériaux de Strasbourg (IPCMS), CNRS-Université de Strasbourg (UMR7504), 67034 Strasbourg, France

\* Correspondence: eszerb@acad-icht.tm.edu.ro (E.I.S.); florica.manea@upt.ro (F.M.)

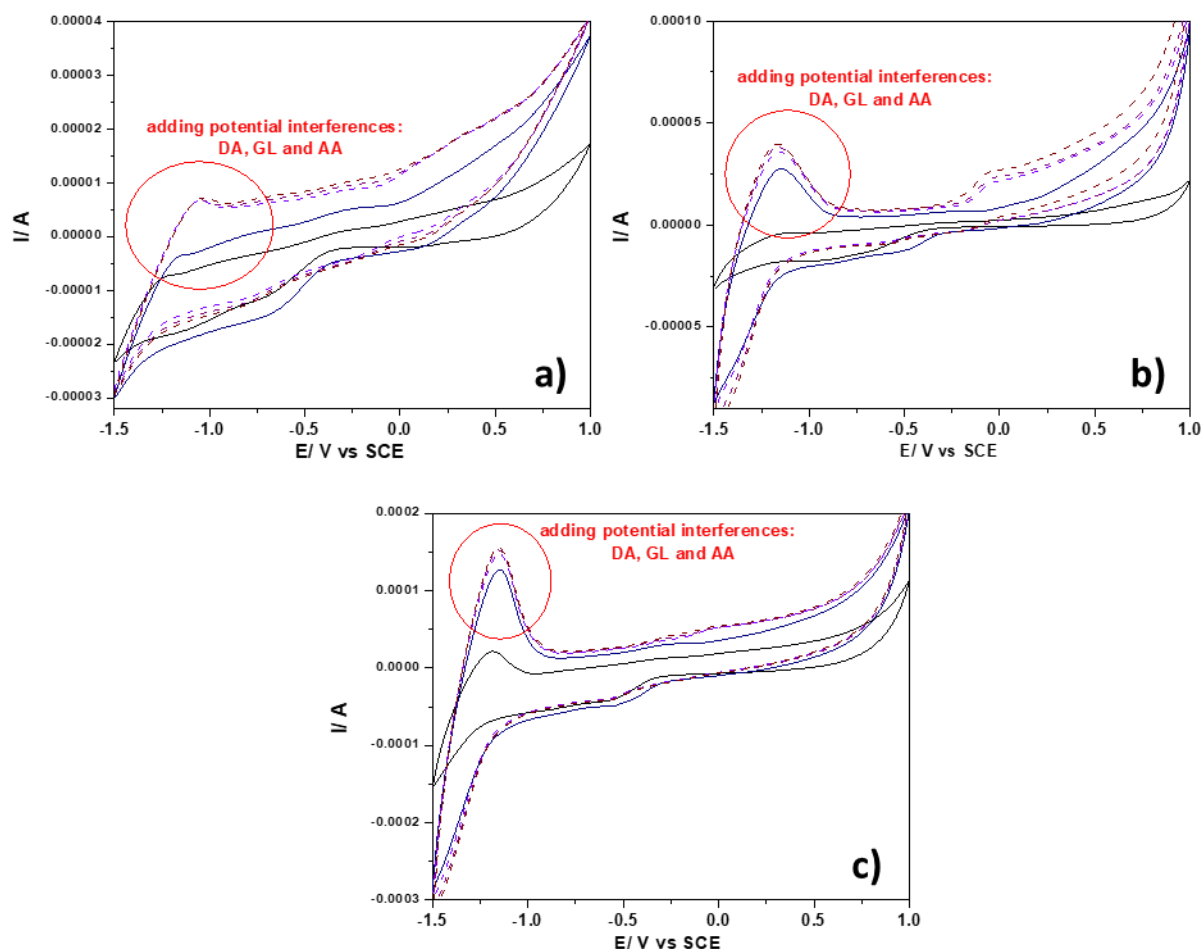

**Figure S1.** Cyclic voltammograms recorded at: (a) PE\_01 paste electrode, (b) PE\_02 paste electrode and (c) PE\_03 paste electrode, in 0.1 M NaOH supporting electrolyte (curve 1) and in the presence



of 5 mM UA concentration and potential interferences (1 mM): DA, GL and AA; potential scan rate:  $0.05 \text{ V} \cdot \text{s}^{-1}$ ; potential range from  $-1.5 \text{ V}$  to  $+1 \text{ V}/\text{Ag}/\text{AgCl}$ .

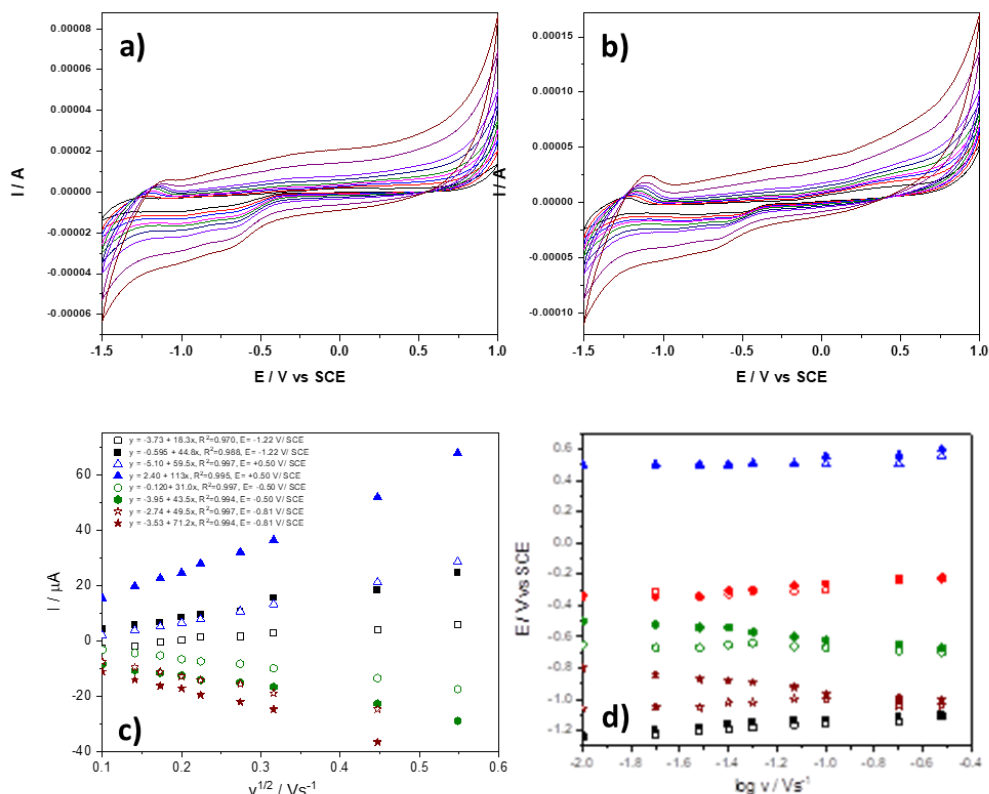

**Figure S2.** Cyclic voltammograms recorded in: (a) the absence of UA 0.1 M NaOH supporting electrolyte, and in (b) the presence of 3 mM UA with the PE\_03 paste electrode at various scan rates: (curve 1) 10, (curve 2) 20, (curve 3) 30, (curve 4) 40, (curve 5) 50, (curve 6) 75, (curve 7) 100, (curve 8) 200, and (curve 9)  $300 \text{ mV} \cdot \text{s}^{-1}$ ; (c) Dependence of anodic and cathodic peaks current vs. square root of the scan rate. (d) Dependence of peak potential vs logarithm of the scan rate.

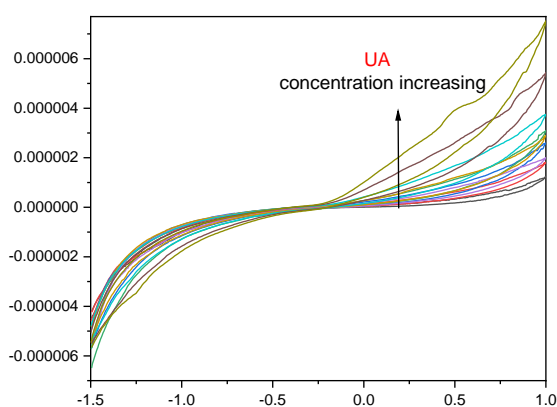

**Figure S3.** Cyclic voltammograms recorded at  $80^\circ\text{C}$  for PE\_03 paste electrode, in 0.1 M NaOH supporting electrolyte (curve 1) and in the presence of 1-8 mM UA concentrations; potential scan rate:  $0.05 \text{ V} \cdot \text{s}^{-1}$ ; potential range from  $-1.5 \text{ V}$  to  $+1 \text{ V}/\text{SCE}$ .
